# Supplementary material for: Quality of Life Among Cancer Patients at Kosti Teaching Hospital, White Nile State, Sudan
Source: Research Square preprint supplement (doi:10.21203/rs.3.rs-8147427/v1), 2025-12-08
Supplement: Supplementary file 1 [file d38f286b75b49b8891a77ed0.docx]

**Supplementary Table 1: Mean Scores and Standard Deviations of Quality-of-Life (EORTC QLQ-C30) Scales by Employment Group Among Study Participants (n = 188)**

| **Scales** | **Child** | **Doctor** | **Employee** | **Farmer** | **Freelancer** | **Housewife** | **Retired** | **Student** | **Unemployed** | **Worker** | **Total** | **P-value** |
| --- | --- | --- | --- | --- | --- | --- | --- | --- | --- | --- | --- | --- |
| **Mean (SD)** | **Mean (SD)** | **Mean (SD)** | **Mean (SD)** | **Mean (SD)** | **Mean (SD)** | **Mean (SD)** | **Mean (SD)** | **Mean (SD)** | **Mean (SD)** | **Mean (SD)** |
| **Functional scales** |  |  |  |  |  |  |  |  |  |  |  |  |
| Physical | 33.33 (0.00) | 100.00 (0.00) | 51.47 (22.57) | 49.63 (28.50) | 73.33 (27.22) | 45.38 (26.54) | 48.00 (31.76) | 73.33 (0.00) | 48.33 (27.37) | 54.67 (26.44) | 48.37 (26.53) | 0.499 |
| Role | 100.00 (0.00) | 100.00 (0.00) | 58.00 (45.42) | 92.59 (14.70) | 50.00 (57.74) | 51.60 (42.98) | 40.00 (43.46) | 100.00 (0.00) | 40.48 (43.85) | 51.67 (38.85) | 53.19 (43.35) | 0.797 |
| Emotional | 100.00 (0.00) | 100.00 (0.00) | 78.33 (24.53) | 93.52 (11.92) | 75.00 (20.41) | 77.08 (18.38) | 91.67 (12.91) | 50.00 (0.00) | 84.82 (19.05) | 58.33 (18.06) | 78.63 (17.69) | 0.936 |
| Cognitive | 100.00 (0.00) | 100.00 (0.00) | 72.00 (24.39) | 79.63 (17.47) | 91.67 (11.79) | 76.12 (17.15) | 96.67 (8.17) | 100.00 (0.00) | 85.71 (14.13) | 71.67 (15.83) | 78.19 (16.21) | 0.992 |
| Social | 100.00 (0.00) | 100.00 (0.00) | 63.33 (31.34) | 59.26 (35.47) | 62.50 (32.22) | 64.10 (31.85) | 73.33 (28.41) | 100.00 (0.00) | 55.36 (34.28) | 76.67 (28.49) | 63.92 (32.21) | 0.831 |
| **Symptoms scales** |  |  |  |  |  |  |  |  |  |  |  |  |
| Fatigue | 88.89 (15.72) | 66.67 (23.57) | 56.44 (25.05) | 65.43 (19.61) | 55.56 (28.35) | 53.42 (22.62) | 53.33 (24.03) | 100.00 (0.00) | 46.83 (21.12) | 40.00 (23.33) | 53.25 (23.12) | 0.814 |
| Nausea and vomiting | 100.00 (0.00) | 100.00 (0.00) | 77.33 (21.89) | 88.89 (14.38) | 75.00 (19.31) | 74.36 (20.19) | 96.67 (8.17) | 50.00 (0.00) | 82.74 (15.68) | 56.67 (17.35) | 76.51 (16.69) | 0.831 |
| Pain | 100.00 (0.00) | 100.00 (0.00) | 63.33 (28.45) | 68.52 (26.06) | 62.50 (32.22) | 57.85 (27.65) | 60.00 (25.82) | 100.00 (0.00) | 58.33 (27.13) | 56.67 (24.34) | 59.93 (27.05) | 0.99 |
| Dyspnoea | 100.00 (0.00) | 100.00 (0.00) | 93.33 (12.47) | 66.67 (26.01) | 58.33 (28.87) | 85.90 (20.43) | 80.00 (21.60) | 100.00 (0.00) | 89.29 (21.00) | 80.00 (19.48) | 85.64 (21.10) | 0.712 |
| Insomnia | 100.00 (0.00) | 66.67 (23.57) | 73.33 (31.77) | 85.19 (21.58) | 66.67 (28.87) | 72.76 (26.09) | 53.33 (28.22) | 100.00 (0.00) | 76.19 (24.96) | 66.67 (25.77) | 73.23 (26.01) | 0.827 |
| Appetite loss | 100.00 (0.00) | 100.00 (0.00) | 77.33 (27.68) | 92.59 (17.83) | 66.67 (28.87) | 66.03 (27.25) | 53.33 (33.84) | 100.00 (0.00) | 63.10 (29.31) | 66.67 (27.09) | 68.62 (28.74) | 0.814 |
| Constipation | 100.00 (0.00) | 33.33 (23.57) | 70.67 (27.78) | 88.89 (14.38) | 50.00 (35.36) | 76.60 (27.39) | 80.00 (26.67) | 100.00 (0.00) | 69.05 (28.79) | 80.00 (26.06) | 75.00 (27.12) | 0.209 |
| Diarrhoea | 100.00 (0.00) | 100.00 (0.00) | 76.00 (27.83) | 85.19 (19.61) | 100.00 (0.00) | 78.85 (26.13) | 86.67 (18.13) | 100.00 (0.00) | 88.10 (20.83) | 70.00 (23.09) | 80.67 (21.51) | 0.804 |
| Financial difficulties | 0.00 (0.00) | 0.00 (0.00) | 20.00 (35.15) | 0.00 (0.00) | 25.00 (35.36) | 21.15 (31.54) | 66.67 (23.57) | 33.33 (23.57) | 23.81 (33.71) | 6.67 (15.07) | 20.74 (30.45) | 0.021 |
| **Overall** |  |  |  |  |  |  |  |  |  |  |  |  |
| Global health status/QoL | 16.67 (23.57) | 8.33 (11.78) | 32.00 (23.45) | 25.93 (20.68) | 29.17 (25.30) | 34.38 (21.63) | 28.33 (18.54) | 41.67 (18.03) | 37.20 (20.73) | 38.33 (16.50) | 33.82 (20.63) | 0.008 |

**Supplementary Table 2: Mean Scores and Standard Deviations of Quality-of-Life (EORTC QLQ-C30) Scales by Age Group Among Study Participants (n = 188)**

| **Scale** | **Under 30 years** | **30 – 44 years** | **45 – 59 years** | **60 – 74 years** | **75+** | **Total** | **P-value** |
| --- | --- | --- | --- | --- | --- | --- | --- |
| **Mean (SD)** | **Mean (SD)** | **Mean (SD)** | **Mean (SD)** | **Mean (SD)** | **Mean (SD)** |  |
| **Functional scales** |  |  |  |  |  |  |  |
| Physical | 61.43 (24.69) | 48.60 (27.11) | 49.87 (26.24) | 43.39 (26.57) | 43.33 (25.91) | 48.37 (26.53) | 0.688 |
| Role | 76.19 (33.15) | 47.81 (45.88) | 57.56 (42.91) | 45.15 (42.63) | 52.78 (47.63) | 53.19 (43.35) | 0.11 |
| Emotional | 83.33 (16.67) | 85.75 (20.77) | 75.44 (29.95) | 75.00 (30.43) | 95.83 (6.97) | 78.63 (27.53) | 0.653 |
| Cognitive | 95.24 (13.76) | 83.77 (23.08) | 76.22 (27.97) | 71.52 (33.13) | 88.89 (20.18) | 78.19 (28.32) | 0.262 |
| Social | 65.48 (34.88) | 55.26 (31.51) | 69.33 (29.00) | 60.00 (32.17) | 83.33 (25.82) | 63.92 (31.21) | 0.364 |
| **Symptoms scales** |  |  |  |  |  |  |  |
| Fatigue | 68.25 (23.41) | 49.71 (33.66) | 54.37 (35.78) | 50.51 (31.78) | 51.85 (19.46) | 53.25 (33.05) | 0.767 |
| Nausea and vomiting | 79.76 (29.37) | 66.23 (35.83) | 76.00 (32.45) | 81.82 (28.38) | 91.67 (20.41) | 76.51 (31.82) | 0.935 |
| Pain | 79.76 (32.14) | 57.89 (39.85) | 59.33 (36.68) | 57.58 (34.22) | 55.56 (44.31) | 59.93 (36.63) | 0.061 |
| Dyspnoea | 97.62 (8.91) | 91.23 (20.04) | 81.78 (33.91) | 82.42 (32.62) | 100.00 (0.00) | 85.64 (29.66) | 0.311 |
| Insomnia | 92.86 (26.73) | 73.68 (38.09) | 68.44 (42.41) | 75.15 (35.26) | 66.67 (51.64) | 73.23 (38.98) | 0.258 |
| Appetite loss | 90.48 (27.51) | 64.04 (44.78) | 68.44 (41.70) | 65.45 (42.05) | 77.78 (40.37) | 68.62 (41.68) | 0.749 |
| Constipation | 71.43 (46.88) | 85.09 (30.70) | 78.22 (35.30) | 63.64 (46.82) | 83.33 (40.82) | 75.00 (39.70) | 0.04 |
| Diarrhoea | 88.10 (30.96) | 80.70 (37.67) | 74.22 (38.58) | 87.27 (29.74) | 83.33 (18.26) | 80.67 (35.14) | 0.04 |
| Financial difficulties | 11.90 (28.06) | 20.18 (36.79) | 24.44 (39.64) | 16.97 (35.64) | 33.33 (51.64) | 20.74 (37.46) | 0.715 |
| **Overall** |  |  |  |  |  |  |  |
| Global health status/QoL | 36.90 (12.10) | 34.21 (14.86) | 32.67 (15.30) | 35.45 (14.36) | 23.61 (11.08) | 33.82 (14.66) | 0.716 |
